# Supplementary material for: Decoding the mechanism of proanthocyanidins in central analgesia: redox regulation and KCNK3 blockade
Source: Springer Nature journal article supplement (doi:10.1038/s12276-025-01412-5), 2025-03-03
Supplement: MOESM1 [file 12276_2025_1412_MOESM1_ESM.pdf]

## Supplementary information

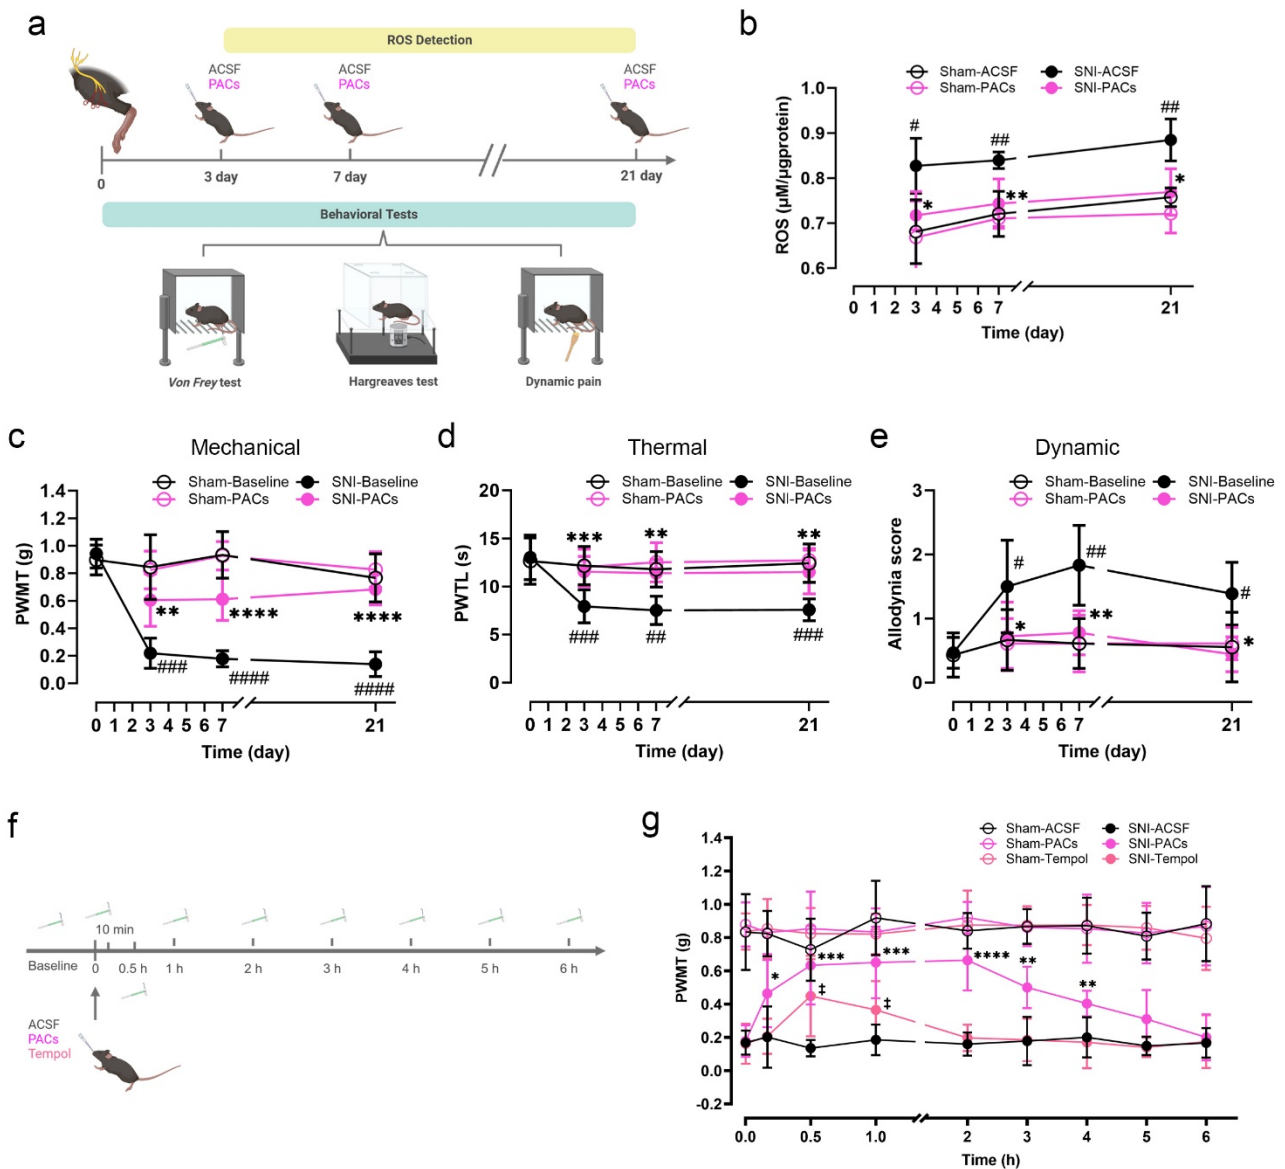

**Supplementary Fig. 1. Temporal changes in pain behaviors, ROS levels, and PACs' analgesic effects. a,** Experimental timeline and setup for ROS detection and pain behavioral tests. **b,** Quantification of ROS levels in the VLO over time, with measurements taken at day 3, 7, and 21 post-surgery in sham and SNI mice. **c-e,** Temporal changes in pain behaviors following SNI and PACs treatment: **c,** Mechanical pain sensitivity (PWMT) measured by *von Frey* test at days 3, 7, and 21 post-surgery; **d,** Thermal pain sensitivity (PWTL) measured by Hargreaves test at day 3, 7, and 21 post-surgery; **e,** Dynamic allodynia score measured by brushing the lesioned paw at day 3, 7, and 21 post-surgery. **f,** Timeline for assessing the duration of analgesic effects of PACs and Tempol at 7 days post-surgery using the *von Frey* test. **g,** Time course of PWMT measurements following

intranasal administration of PACs or Tempol, showing changes in pain threshold over a 6-hour period. Data are expressed as mean  $\pm$  S.D. #: sham-ACSF vs. SNI-ACSF, \*: SNI-PACs vs. SNI-ACSF, ‡: SNI-Tempol vs. SNI-ACSF \*<sup>#/‡</sup>  $P < 0.05$ , \*\*<sup>#</sup>  $P < 0.01$ , \*\*\*<sup>###</sup>  $p < 0.001$ , \*\*\*\*<sup>####</sup>  $p < 0.0001$ . See source data file for detailed statistical tests.

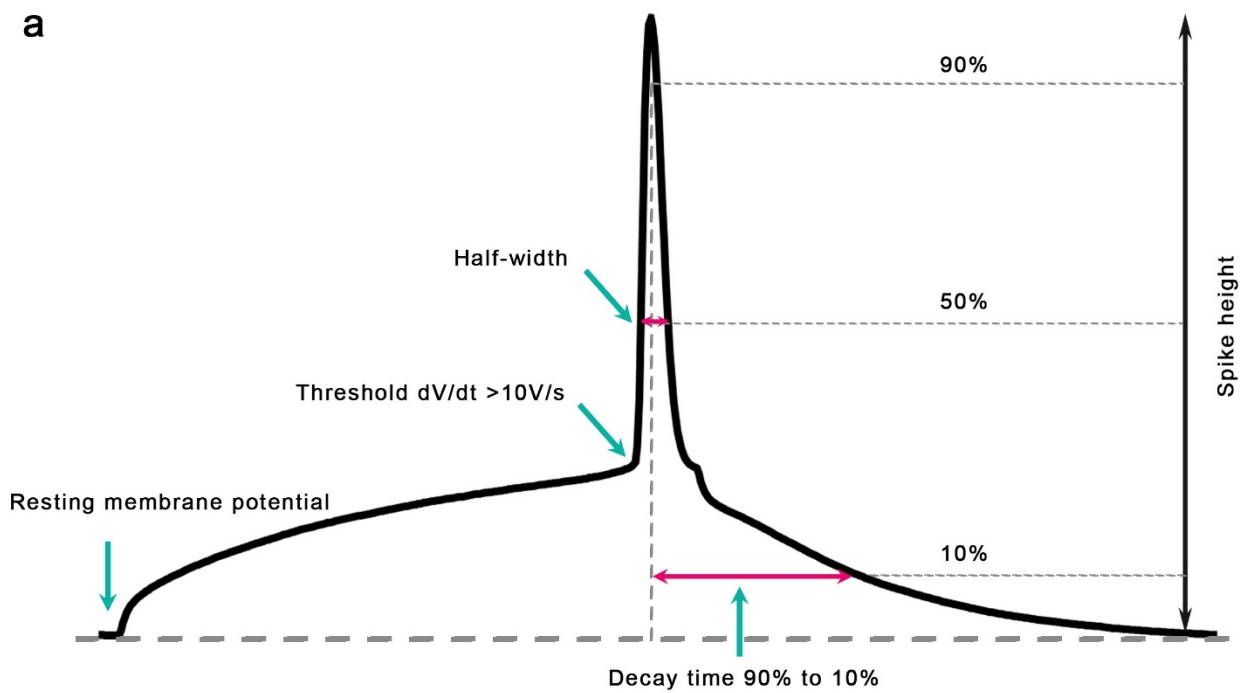

**b**

|                           | Sham-Baseline        | Sham-PACs            | SNI-Baseline              | SNI-PACs               |
|---------------------------|----------------------|----------------------|---------------------------|------------------------|
| AP threshold (mV)         | $-36.05 \pm 0.5545$  | $-36.93 \pm 1.324$   | $-39.58 \pm 0.9157^{**}$  | $-37.97 \pm 0.6133$    |
| Spike Height (mV)         | $114.1 \pm 1.497$    | $111.2 \pm 1.674$    | $114.3 \pm 1.540$         | $112.6 \pm 1.658$      |
| Half- Width (ms)          | $1.861 \pm 0.09948$  | $1.920 \pm 0.1380$   | $1.535 \pm 0.05326^{**}$  | $1.535 \pm 0.05154$    |
| Rise time (ms)            | $0.2983 \pm 0.01340$ | $0.3156 \pm 0.01702$ | $0.2608 \pm 0.005592^{*}$ | $0.2840 \pm 0.009428$  |
| Max Rise slope (V/s)      | $188.5 \pm 11.50$    | $171.6 \pm 13.43$    | $209.7 \pm 5.976$         | $186.9 \pm 7.300^{##}$ |
| Max Decay slope (V/s)     | $-59.34 \pm 3.707$   | $-59.26 \pm 4.591$   | $-74.22 \pm 2.892^{**}$   | $-74.27 \pm 2.373$     |
| Decay time 90%to 10% (ms) | $22.23 \pm 1.487$    | $24.11 \pm 2.237$    | $17.89 \pm 1.367^{*}$     | $22.03 \pm 1.743^{##}$ |

**Supplementary Fig. 2. Summary of the electrophysiological parameters of AP of PYR<sup>VLO</sup> in sham and SNI mice.** **a**, A diagram displaying the electrophysiological parameters of AP elicited by rheobase current. **b**, Summary of the AP parameters of PYR<sup>VLO</sup> in sham and SNI mice. Data are expressed as mean  $\pm$  S.E.M. \*: SNI-Baseline (n = 14) *vs.* Sham-Baseline (n = 14), two-tailed unpaired t test; #: SNI-PACs *vs.* SNI-Baseline, n = 14, two-tailed paired t test.  $^{*}/^{#}P < 0.05$ ,  $^{**}/^{##}P < 0.01$ .

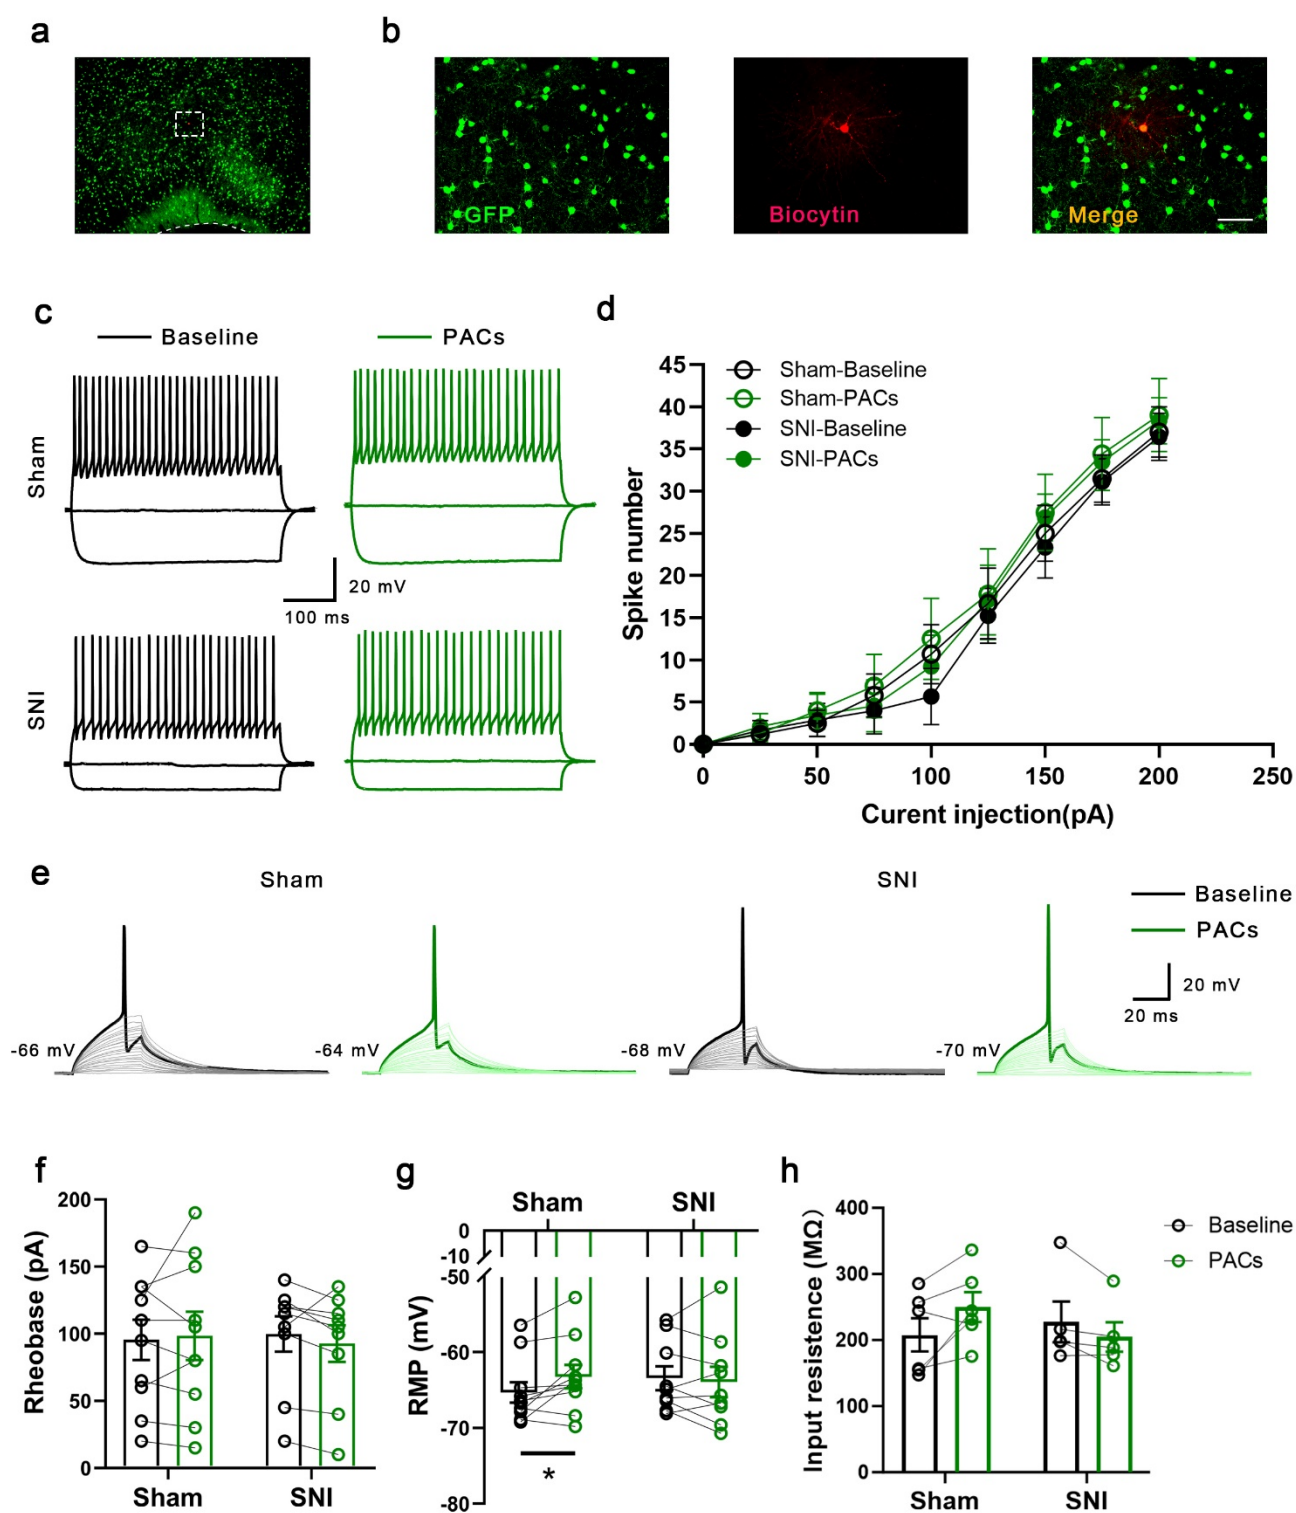

**Supplementary Fig. 3. PACs have minimal impact on the activities of INT<sup>VLO</sup>.** **a**, GFP<sup>+</sup> neurons in the VLO in a GAD67-GFP transgenic mouse. **b**, Images showing GFP<sup>+</sup> interneurons (left), one whole-cell patched neuron labeled with biocytin and stained with TRITC (middle), and the merged image (right). **c**, Representative traces of action potentials elicited by 150 pA current stimulation before and during PACs application in sham

and SNI mice. **d**, Spikes evoked by step depolarizing currents before and during PACs application in sham (n = 10) and SNI (n = 9) mice. **e**, Representative traces of current threshold (rheobase) to elicit the first action potential before and during application of PACs in sham and SNI mice. **f**, Rheobase of INT<sup>VLO</sup> before and during application of PACs in sham (n = 10) and SNI (n = 9) mice. **g**, RMP of INT<sup>VLO</sup> before and during application of PACs in sham (n = 10) and SNI (n = 9) mice (Sham-Baseline *vs.* Sham-PACs,  $p = 0.0268$ ). **h**, Input resistance of INT<sup>VLO</sup> before and during application of PACs in sham (n = 6) and SNI (n = 5) mice (Sham-Baseline *vs.* Sham-PACs,  $p = 0.0190$ ). Data are expressed as mean  $\pm$  S.E.M. See source data file for detailed statistical tests.  $*p < 0.05$ .

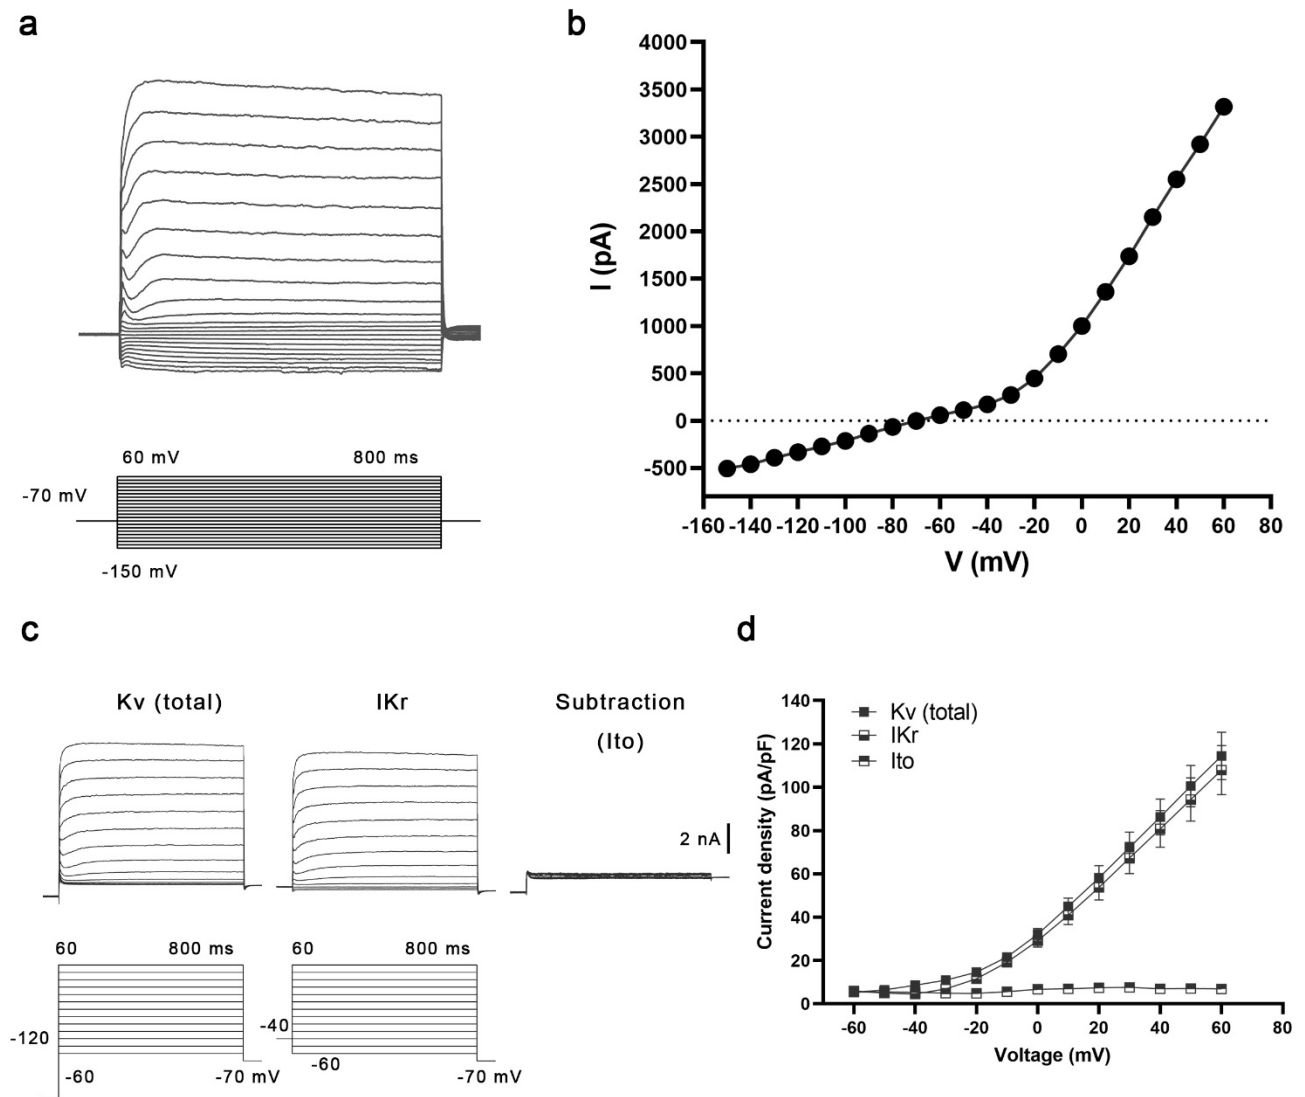

**Supplementary Fig. 4. The delayed outward rectifier potassium current ( $IK_r$ ) is the main component in the total voltage-dependent potassium ( $K_v$ ) currents in  $PYR^{VLO}$ .** **a**, Representative traces of total potassium currents (top) and the voltage command (bottom). **b**, I-V curve of total potassium currents for (a). **c**, Representative traces of total voltage-dependent potassium ( $K_v$ ) current (left), delayed outward rectifier potassium ( $IK_r$ ) current (middle), and transient outward potassium ( $I_{to}$ ) current (right) obtained by subtraction  $IK_r$  from total  $K_v$ . **d**, Current density-voltage curves for total  $K_v$ ,  $IK_r$  and  $I_{to}$ . Data are expressed as mean  $\pm$  S.E.M.  $n = 8$ . See source data file for detailed statistical tests.

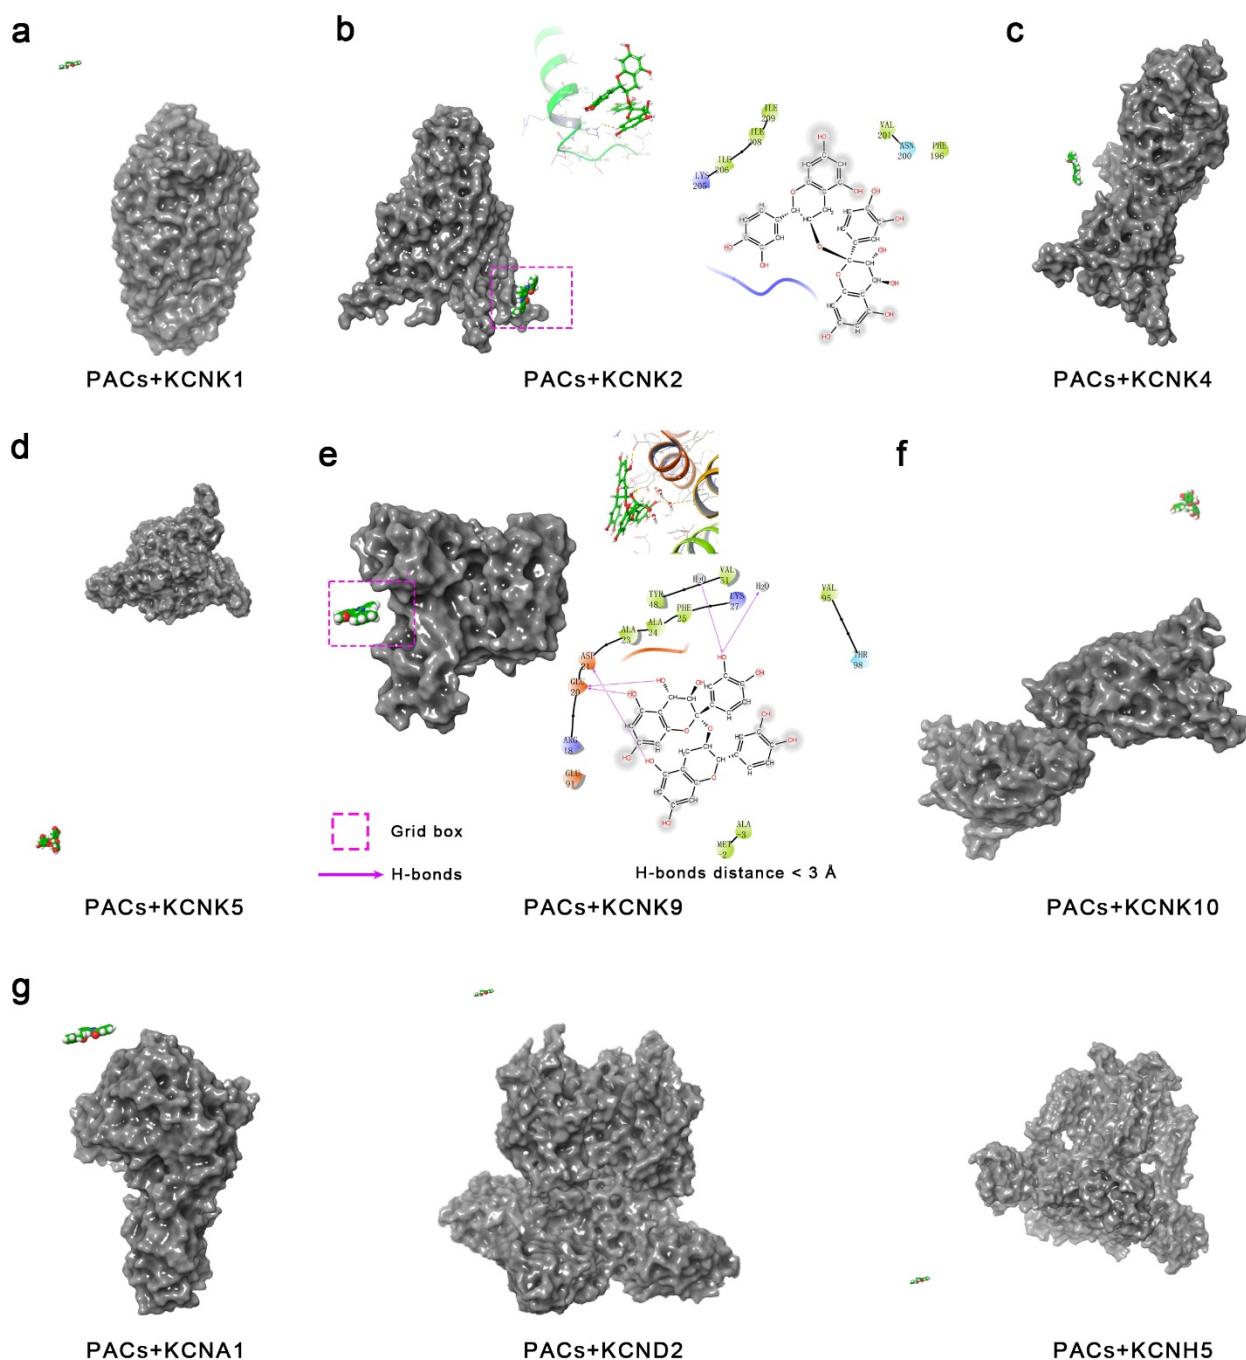

**Supplementary Fig. 5. Prediction of PACs binding sites in other leak potassium channels and the PACs-downregulated Kv channels.** **a**, PACs has no predicted binding site in KCNK1. **b**, The predicted binding site of PACs in KCNK2 is on the cytoplasmic domain. **c**, PACs has no predicted binding site in KCNK4. **d**, PACs has no predicted binding site in KCNK5. **e**, The predicted binding site of PACs in KCNK9 is on the transmembrane domain. **f**, PACs has no predicted binding site in KCNK10. **g**, PACs has no predicted binding sites in the

upregulated Kv channels in SNI mice.



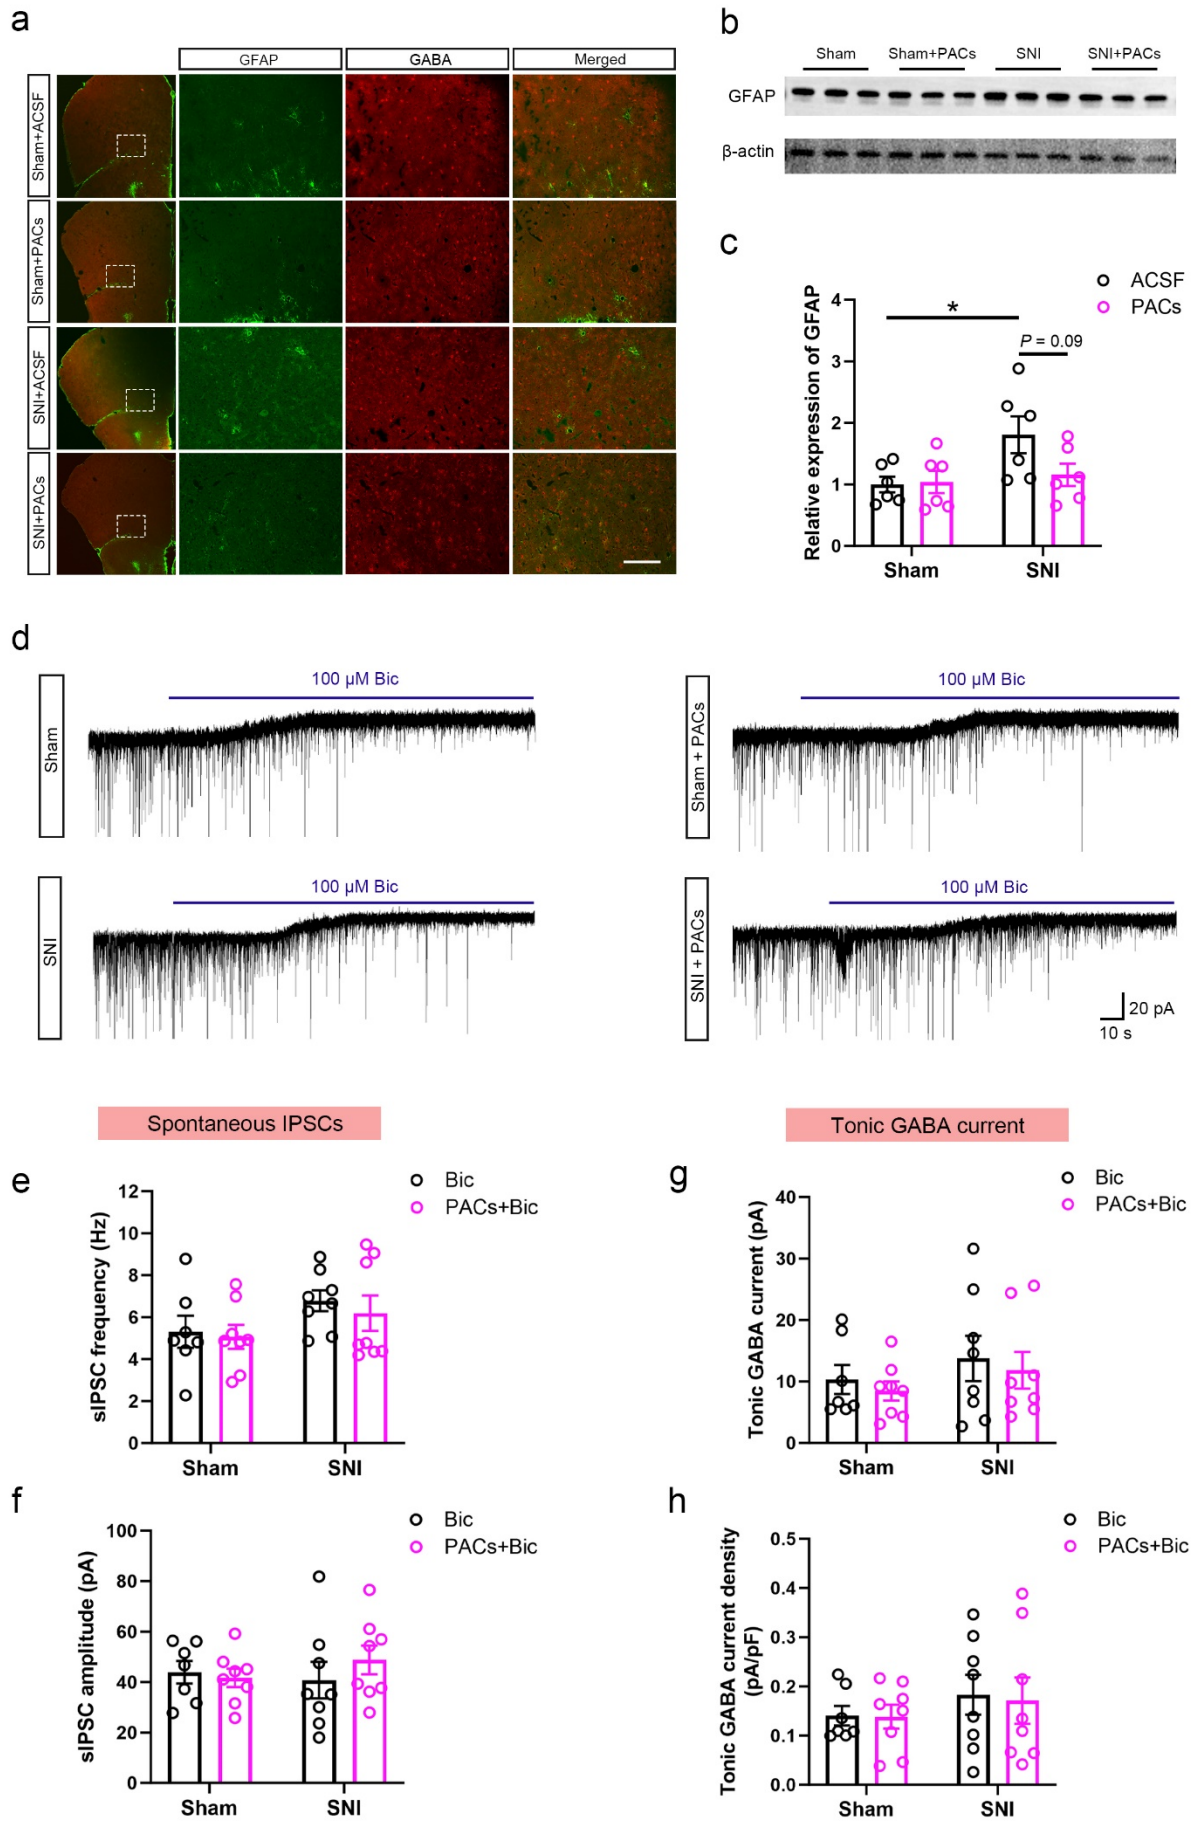

**Supplementary Fig. 6. Astrocytes are activated after SNI, but PACs have no effect on the astrocytic GABA-mediated current.** **a**, Immunofluorescence staining of GFAP (green) and GABA (red) in the VLO across different treatment groups. Scale bar = 100  $\mu$ m. **b**, Western blot analysis of GFAP protein expression in the VLO across treatment groups, with  $\beta$ -Actin as the loading control. **c**, Summary data of relative GFAP expression levels: sham-ACSF (n = 6) vs. SNI-ACSF (n = 6),  $p = 0.0328$ . **d**, Representative traces of spontaneous IPSCs and tonic GABA-mediated current recorded in  $\text{PYR}^{\text{VLO}}$  in sham and SNI mice. **e-f**, summary data of frequency (**e**) and amplitude (**f**) of spontaneous IPSCs in Sham and SNI groups with and without PACs treatment. **g-h**, summary data of amplitude (**g**) and current density (**h**) of tonic GABAergic current in Sham and SNI groups with and without PACs treatment. Bic, bicuculline; sIPSC, spontaneous inhibitory postsynaptic currents. Data are expressed as mean  $\pm$  S.E.M. \* $P < 0.05$ . See source data file for detailed statistical tests.
